# Supplementary material
Source: publisher figshare collection journal article supplement (https://gsapubs.figshare.com/ndownloader/files/27185024)
Supplement: Supplementary file 1 [file 27185024]

GS2231 Supplemental figure and table captions

Figure A1: Logs of trenches WT-9A, WT-10 and WT-11, showing exposures of Qf1, location of OSL samples BC-8 and BC-9 in WT-9A and location of soil profile BC01 in WT-10. See Figure 3 legend for description of units not described on the figure itself

Figure A2: Logs of trenches WT-7B and WT-3B showing exposures of Qf2 and location of soil profile BC02. See Figure 3 legend for description of units not described on the figure itself.

Figure A3: Photomosaic of the northern end of trench WT-3C, showing the locations of dated luminescence sample BC2 and dated radiocarbon sample BC-8 from a ~10-cm-thick sand layer within Qf2. Luminescence sample BC1 could not be dated. View to west. See Figure 3 for locations of these samples in map-view.

Figure A4: Photomosaic showing the location of dated radiocarbon sample BC-22 from Qf3 in the west wall of trench WT-1B, near the northern end of the trench. See Figure 3 for location of sample in map-view.

Figure A5: Photomosaic showing the location of dated radiocarbon sample BC-51 in a natural exposure of Qa4. See Figure 3 for location of sample in map-view. View to west.

Figure A6. LiDAR imagery (0.5-m resolution) from the B4 project (Bevis et al., 2005) showing locations of trenches and geochronological samples in the vicinity of Badger Canyon. White circles mark radiocarbon samples, blue circles mark OSL dating samples, red circles mark cosmogenic nuclide (10Be) samples from boulder tops, and yellow squares mark soil profile descriptions. Black boxes in lower right corner of (a) marks location of part (b) of this figure. Black box in upper left corner of (a) marks the Badger Canyon study area and the location of the geologic map shown in Figure 3.

Table A1. Locations of radiocarbon samples from Badger Canyon.

Table A2. Locations of OSL samples from Badger Canyon.

Table A3. Soil Profile Descriptions.

Table A4. Field and lab measurements for 10Be samples from boulders at Matthews Ranch (mr) and Badger Canyon (BC).

Table A5. 10Be boulder ages using a variety of production rates and models. The results shown in red are those discussed in the text and used in the Matthews Ranch (Pitman Canyon) slip rate calculations.
